# Supplementary material for: The long noncoding RNA LINC01140/miR-140-5p/FGF9 axis modulates bladder cancer cell aggressiveness and macrophage M2 polarization
Source: publisher site journal article supplement (doi:10.18632/aging.202147), 2020-11-21
Supplement: Supplementary file [file aging-v12i24-202147-supplementary-material-SD1.pdf]

## SUPPLEMENTARY FIGURES

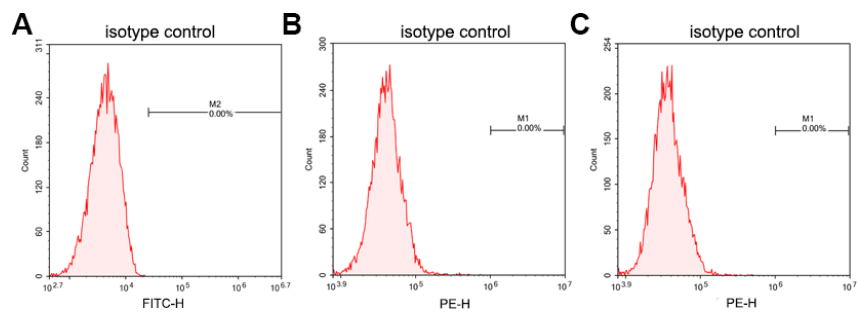

**Supplementary Figure 1. Isotype control for flow cytometry.** (A) Rat IgG isotype control-FITC (ab136125); (B) Rabbit IgG isotype control -PE (ab209478). (C) Mouse IgG isotype control-PE (ab154457).

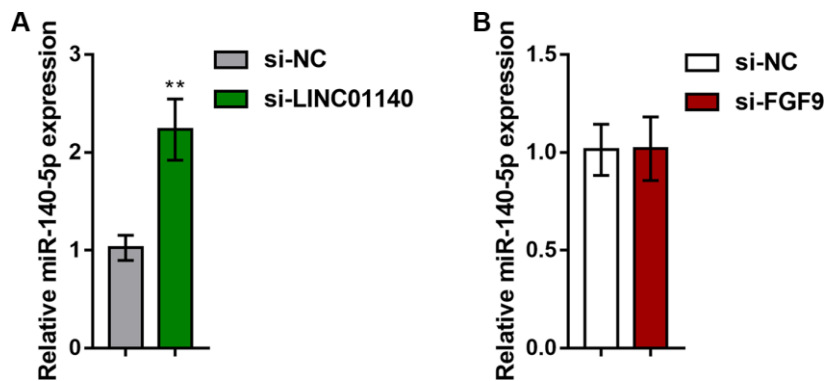

**Supplementary Figure 2. Relevance of miR-140-5p to LINC01140 and FGF9.** (A) The levels of miR-140-5p in response to LINC01140 knockdown; (B) The levels of miR-140-5p in response to FGF9 knockdown in bladder cancer cells.
